# Supplementary material for: Sequence controlled copolymerization of lactide and a functional cyclic carbonate using stereoselective aluminum catalysts
Source: Royal Society of Chemistry journal article supplement (doi:10.1039/c9py00424f), 2019-01-01
Supplement: c9py00424f1.pdf [file c9py00424f1.pdf]

## Supporting information

for

### Sequences controlled copolymerization of lactide and functional cyclic carbonate using stereoselective aluminum catalysts

Xiufang Hua,<sup>a,b</sup> Xinli Liu <sup>\*a</sup> and Dongmei Cui <sup>\*a</sup>

#### Contents

**Figure S1.** GPC profiles of representative samples, entries 1-4, Table 1.

**Figure S2.** Inverse gated decoupled <sup>13</sup>C NMR spectrum for the hopolymerization of *rac*-LA by complex **1** (500 MHz, CDCl<sub>3</sub>).

**Figure S3.** Semilogarithmic kinetic plot in each monomer catalyzed by complex **1**.

**Figure S4.** Plots of conversion vs time for the copolymerization with complex **1** of a) L-LA/MAC and b) *rac*-LA/MAC.

**Figure S5.** Inverse gated decoupled <sup>13</sup>C NMR spectrum for the hopolymerization of *rac*-LA by complex **2** (500 MHz, CDCl<sub>3</sub>).

**Figure S6.** Semilogarithmic kinetic plot in each monomer catalyzed by complex **2**.

**Figure S7.** Plots of composition vs time for the copolymerization with complex **2** of a) L-LA/MAC and b) *rac*-LA/MAC.

**Figure S8.** (a) <sup>1</sup>H NMR and (b) <sup>13</sup>C NMR spectroscopy in CDCl<sub>3</sub>.

**Figure S9.** DSC thermograms of *quasi*-diblock Poly(L-LA-*b*-MAC).

**Table S1.** Homopolymerization of *rac*-LA or MAC with complex **1** and **2**.

**Table S2.** Reactivity ratio calculation for copolymerization of L-LA and MAC catalyzed by complex **1**.

**Table S3.** Reactivity ratio calculation for copolymerization of *rac*-LA and MAC catalyzed by complex **1**.

**Table S4.** Reactivity ratio calculation for copolymerization of L-LA and MAC catalyzed by complex **2**.

**Table S5.** Reactivity ratio calculation for copolymerization of *rac*-LA and MAC catalyzed by complex **2**.

**Supplemental Figures:**

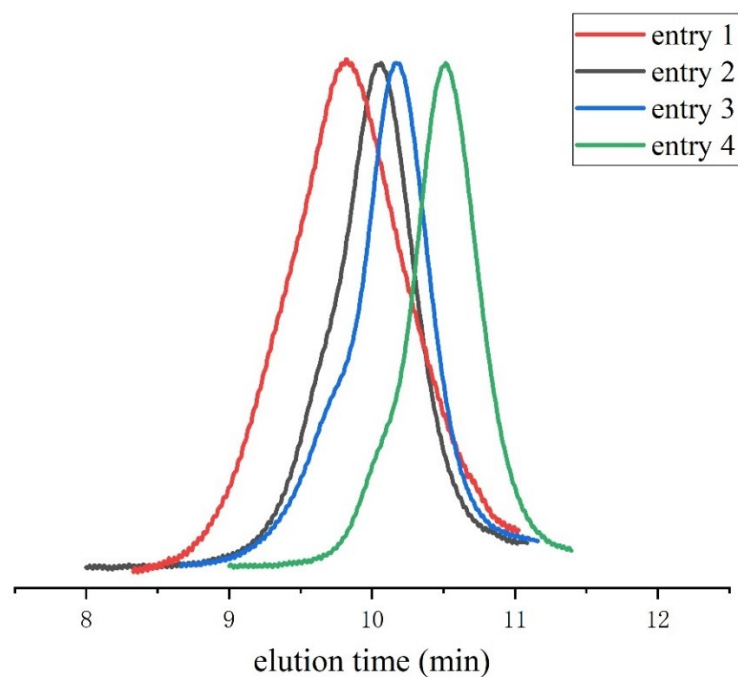

**Figure S1.** GPC profiles of representative samples, entries 1-4, Table 1.

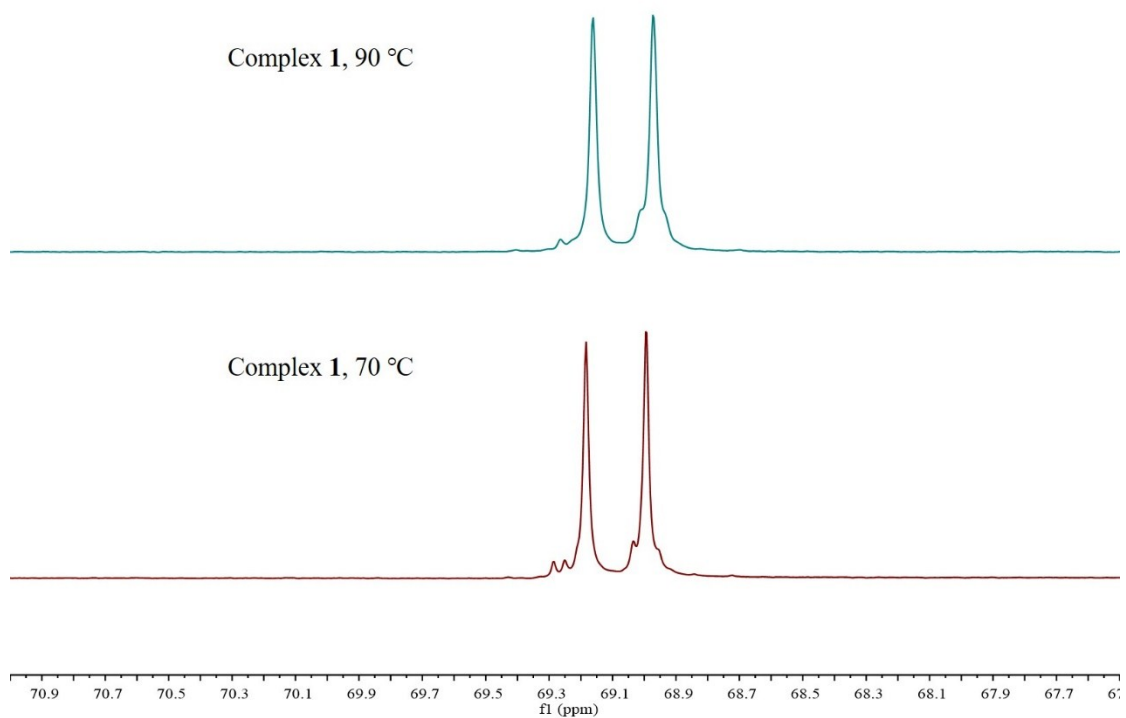

**Figure S2.** Inverse gated decoupled <sup>13</sup>C NMR spectrum for the homopolymerization of *rac*-LA by complex **1** (500 MHz, CDCl<sub>3</sub>).

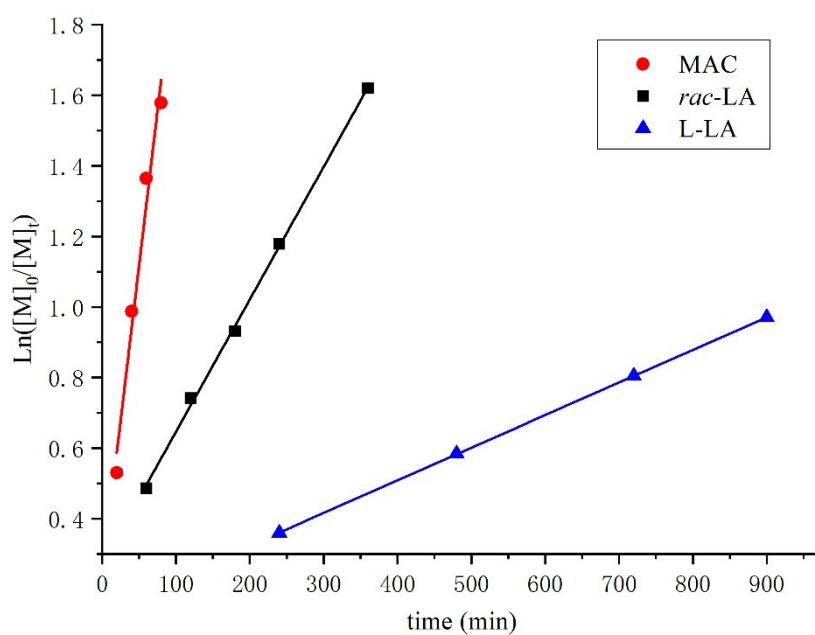

**Figure S3.** Semilogarithmic kinetic plot in each monomer catalyzed by complex **1** ( $k_{\text{app}}(\text{MAC}) = 176.1 \times 10^{-4}$ ,  $k_{\text{app}}(\text{rac-LA}) = 37.6 \times 10^{-4}$ ,  $k_{\text{app}}(\text{L-LA}) = 9.2 \times 10^{-4}$ ), Polymerization conditions: Complex **1** = 10  $\mu\text{mol}$ ; T = 90  $^{\circ}\text{C}$ ; Tol. = 2 mL; ratio = [monomer]:[**1**] = 100:1.

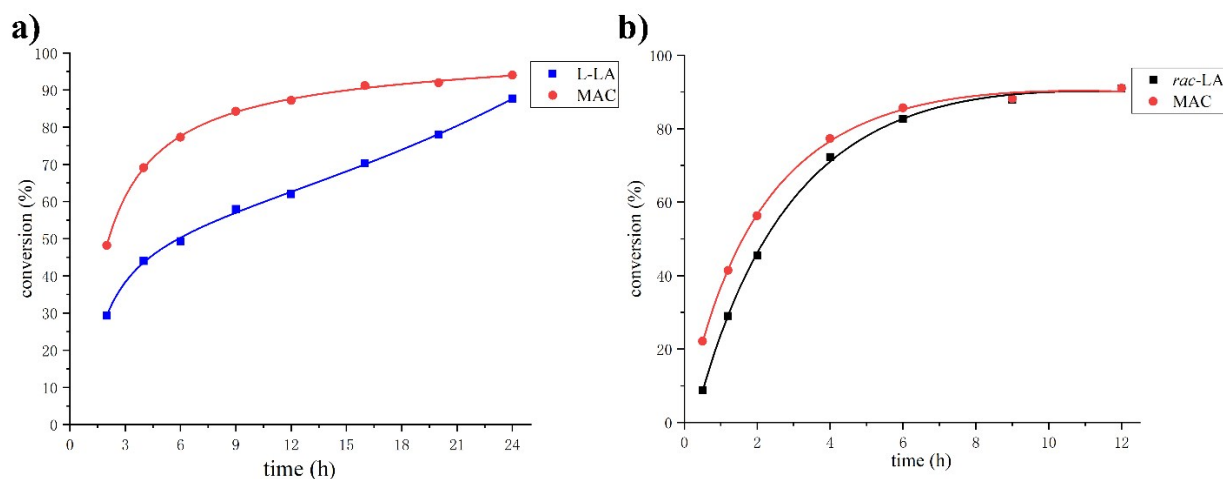

**Figure S4.** Plots of conversion vs time for the copolymerization with complex **1** of a) L-LA/MAC and b) *rac*-LA/MAC.

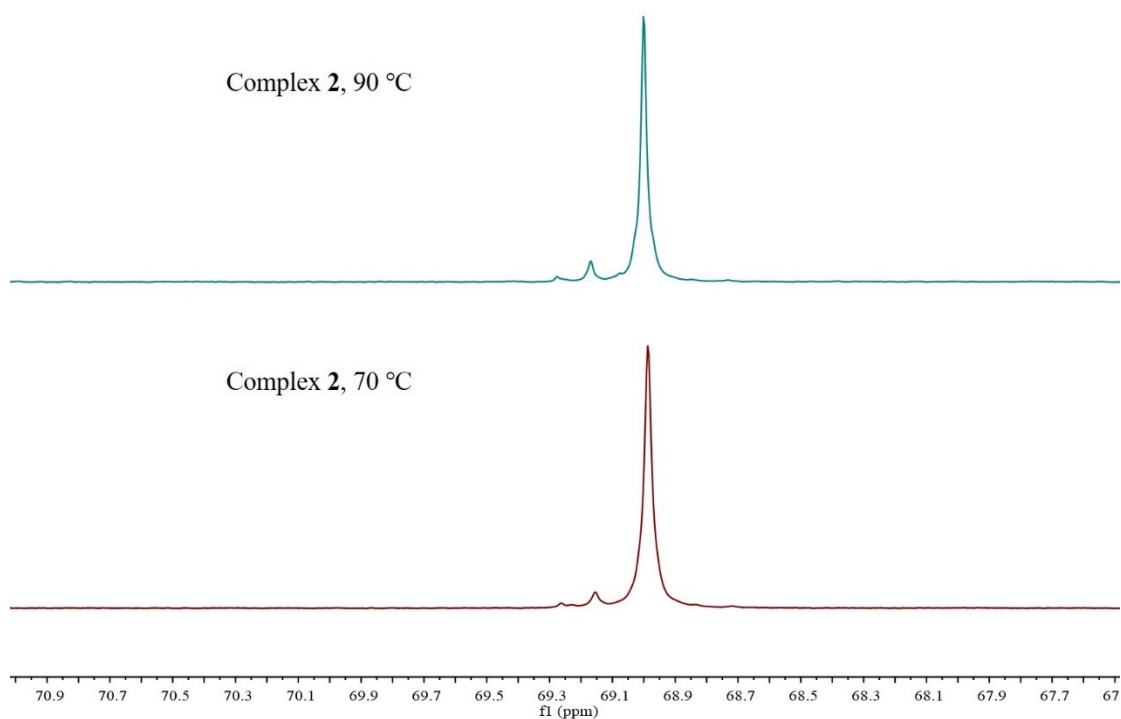

**Figure S5.** Inverse gated decoupled  $^{13}\text{C}$  NMR spectrum for the homopolymerization of *rac*-LA by complex **2** (500 MHz,  $\text{CDCl}_3$ ).

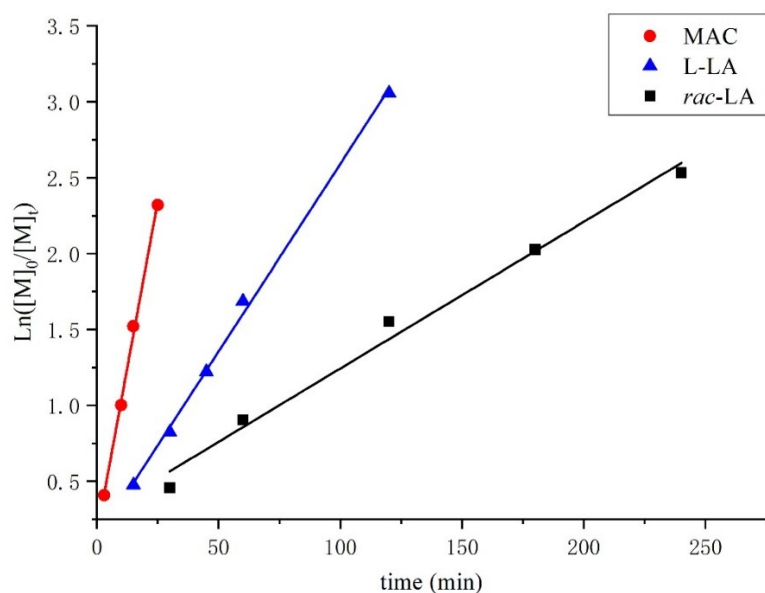

**Figure S6.** Semilogarithmic kinetic plot in each monomer catalyzed by complex **2** ( $k_{\text{app}}(\text{MAC}) = 87.6 \times 10^{-3}$ ,  $k_{\text{app}}(\text{L-LA}) = 24.8 \times 10^{-3}$ ,  $k_{\text{app}}(\text{rac-LA}) = 9.7 \times 10^{-3}$ , Polymerization conditions: complex **2** = 10  $\mu\text{mol}$ ; T = 90  $^{\circ}\text{C}$ ; Tol. = 2 mL; ratio = [monomer]:[**2**] = 100:1.

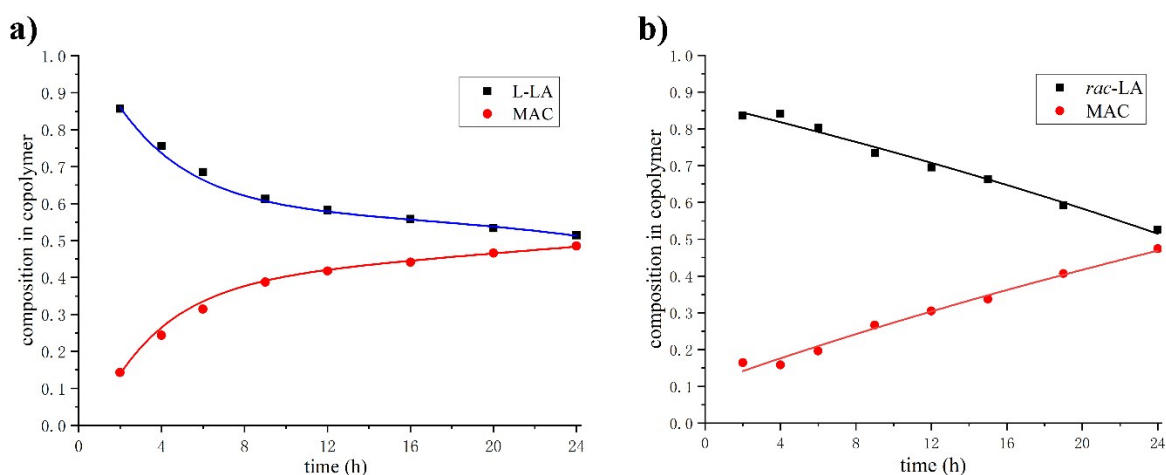

**Figure S7.** Plots of composition vs time for the copolymerization with complex 2 of a) L-LA/MAC and b) *rac*-LA/MAC.

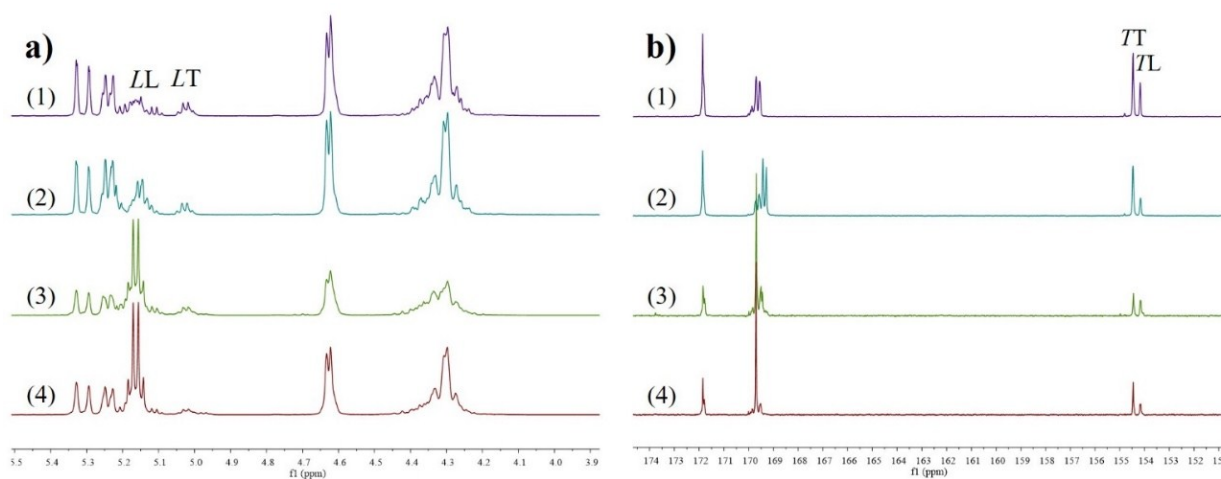

**Figure S8.** (a) <sup>1</sup>H NMR and (b) <sup>13</sup>C NMR spectroscopy in CDCl<sub>3</sub>:

(1) poly(MAC-*r*-L-LA),  $L_{L-LA} = 3.40/L_{MAC} = 3.08$ , (table 1, entry 9);

(2) poly(MAC-*grad*-*rac*-LA),  $L_{rac-LA} = 4.45/L_{MAC} = 3.76$ , (table 1, entry 13);

(3) poly(*rac*-LA-*tapered*-MAC),  $L_{rac-LA} = 6.83/L_{MAC} = 2.29$ , (table 2, entry 9);

(4) *quasi*-diblock poly(L-LA-*b*-MAC),  $L_{L-LA} = 7.43/L_{MAC} = 3.68$ , (table 2, entry 4).

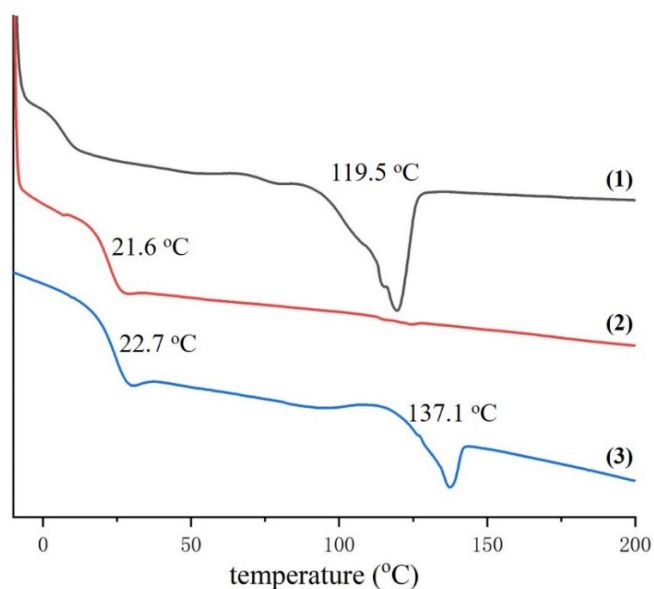

**Figure S9.** DSC thermograms of *quasi*-diblock Poly(L-LA-*b*-MAC) (table 2, entry 4) ( $T_g$  value was calculated by STAR<sup>e</sup> method with heating/cooling rate of 10 °C/min and using second cycle from -10 °C to 200 °C): (1) first heating cycle; (2) after eliminating thermal history; (3) after isothermal crystallization.

**Table S1.** Homopolymerization of *rac*-LA or MAC with complex 1 and 2.

| entry <sup>a</sup> | Cat. | M              | [Cat.] <sub>0</sub> : [CTA] <sub>0</sub> : [M] <sub>0</sub> | conv. <sup>b</sup> (%) | $M_{n,calcd}$ <sup>c</sup> (KDa) | $M_{n,SEC}$ <sup>d</sup> (KDa) | $M_w/M_n$ <sup>d</sup> | $T_g/T_m$ <sup>e</sup> (°C) |
|--------------------|------|----------------|-------------------------------------------------------------|------------------------|----------------------------------|--------------------------------|------------------------|-----------------------------|
| 1                  | 1    | <i>rac</i> -LA | 1:3:100                                                     | 94                     | 4.70                             | 6.06                           | 1.04                   | 40.0/-                      |
| 2                  | 2    | <i>rac</i> -LA | 1:3:100                                                     | 91                     | 4.55                             | 7.75                           | 1.28                   | 49.8/188.5                  |
| 3                  | 1    | MAC            | 1:3:100                                                     | 95                     | 6.52                             | 7.24                           | 1.20                   | -10.5/-                     |

<sup>a</sup>Polymerization conditions: [M]<sub>0</sub> = 0.5 M; CTA = Ph<sub>2</sub>CHOH; T = 90 °C; time = 24 h; toluene = 2 mL

<sup>b</sup>Measured by <sup>1</sup>H NMR. <sup>c</sup> $M_{n,calcd}$  = molar mass of M × [M]<sub>0</sub>/[CTA]<sub>0</sub> × conversion % + the molar mass of CTA. <sup>d</sup>Molecular weight ( $M_n$ ) and dispersity values ( $M_w/M_n$ ) determined by SEC in THF at 40 °C using polystyrene standards. <sup>e</sup>Calculated by DSC measurement (Figure 4)

**Reactivity Ratio Calculation:**

**Table S2.** Reactivity ratio calculation for copolymerization of L-LA and MAC catalyzed by

| entry | L-LA      | MAC       | $f_1/f_2$ | conversion |        |                           |                            |
|-------|-----------|-----------|-----------|------------|--------|---------------------------|----------------------------|
|       | $(f_1)^a$ | $(f_2)^a$ |           | LA (%)     | MAC(%) | LA ( $F_1$ ) <sup>b</sup> | MAC ( $F_2$ ) <sup>b</sup> |
| 1     | 0.8       | 0.2       | 4         | 5.67       | 13.76  | 0.622                     | 0.378                      |
| 2     | 0.7       | 0.3       | 2.333     | 4.67       | 9.32   | 0.539                     | 0.461                      |
| 3     | 0.6       | 0.4       | 1.5       | 8.67       | 13.70  | 0.487                     | 0.513                      |
| 4     | 0.5       | 0.5       | 1         | 6.00       | 7.69   | 0.438                     | 0.562                      |
| 5     | 0.4       | 0.6       | 0.667     | 10.67      | 11.63  | 0.380                     | 0.620                      |
| 6     | 0.3       | 0.7       | 0.429     | 10.67      | 9.34   | 0.329                     | 0.671                      |

complex 1.

<sup>a</sup> $f_1$  and  $f_2$  are defined as mole fractions of monomers LA and MAC in the feed and  $f_1 = 1 - f_2$ .

<sup>b</sup> $F_1$  and  $F_2$  represents the mole fraction of each monomer in the copolymer and  $F_1 = 1 - F_2$

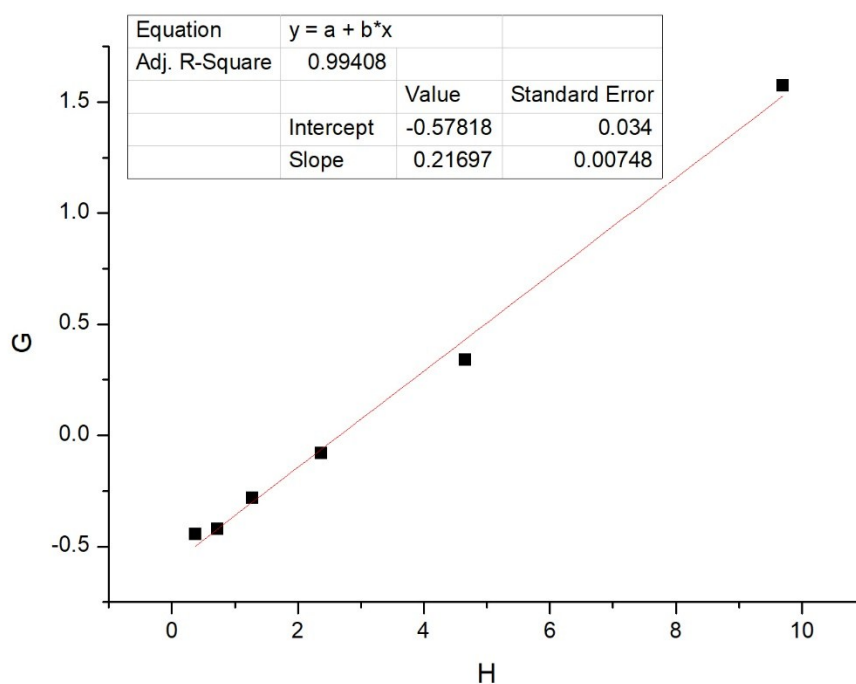

$$H = \frac{f_1^2(1 - F_1)}{(1 - f_1)^2 F_1}, \quad G = \frac{f_1(2F_1 - 1)}{(1 - f_1)F_1}$$

Where  $G = Hr_1 - r_2$ , a plot of H versus G yields a straight line with slope  $r_1$  and intercept  $-r_2$ .

$r_{\text{L-LA}} = 0.217$ ,  $r_{\text{MAC}} = 0.578$ .

| entry | <i>rac</i> -LA<br>( $f_1$ ) <sup>a</sup> | MAC<br>( $f_2$ ) <sup>a</sup> | $f_1/f_2$ | conversion |        |                                   |                                    |
|-------|------------------------------------------|-------------------------------|-----------|------------|--------|-----------------------------------|------------------------------------|
|       |                                          |                               |           | LA (%)     | MAC(%) | LA (F <sub>1</sub> ) <sup>b</sup> | MAC (F <sub>2</sub> ) <sup>b</sup> |
| 1     | 0.7                                      | 0.3                           | 2.333     | 4.81       | 9.80   | 0.534                             | 0.466                              |
| 2     | 0.6                                      | 0.4                           | 1.5       | 4.75       | 10.07  | 0.414                             | 0.586                              |
| 3     | 0.5                                      | 0.5                           | 1         | 3.52       | 7.70   | 0.314                             | 0.686                              |
| 4     | 0.45                                     | 0.55                          | 0.818     | 5.67       | 12.71  | 0.267                             | 0.733                              |
| 5     | 0.4                                      | 0.6                           | 0.667     | 3.53       | 7.98   | 0.228                             | 0.772                              |

**Table S3.** Reactivity ratio calculation for copolymerization of *rac*-LA and MAC catalyzed by complex **1**.

<sup>a</sup> $f_1$  and  $f_2$  are defined as mole fractions of monomers LA and MAC in the feed and  $f_1 = 1 - f_2$ .

<sup>b</sup>F<sub>1</sub> and F<sub>2</sub> represents the mole fraction of each monomer in the copolymer and F<sub>1</sub> = 1 - F<sub>2</sub>.

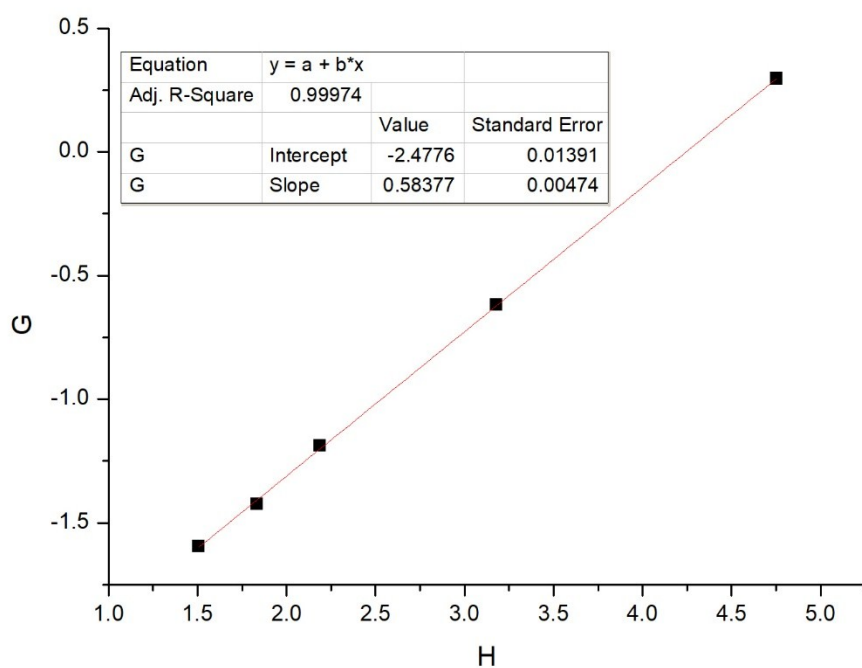



| entry | L-LA      | MAC       | $f_1/f_2$ | conversion |        |                           |                            |
|-------|-----------|-----------|-----------|------------|--------|---------------------------|----------------------------|
|       | $(f_1)^a$ | $(f_2)^a$ |           | LA (%)     | MAC(%) | LA ( $F_1$ ) <sup>b</sup> | MAC ( $F_2$ ) <sup>b</sup> |
| 1     | 0.55      | 0.45      | 1.222     | 11.37      | 4.30   | 0.764                     | 0.236                      |
| 2     | 0.5       | 0.5       | 1         | 11.67      | 4.33   | 0.729                     | 0.271                      |
| 3     | 0.45      | 0.55      | 0.818     | 11.55      | 4.11   | 0.697                     | 0.303                      |
| 4     | 0.4       | 0.6       | 0.667     | 14.09      | 4.54   | 0.674                     | 0.326                      |
| 5     | 0.3       | 0.7       | 0.429     | 16.00      | 4.62   | 0.597                     | 0.403                      |

$$H = \frac{f_1^2(1 - F_1)}{(1 - f_1)^2 F_1}, \quad G = \frac{f_1(2F_1 - 1)}{(1 - f_1)F_1}$$

Where  $G = Hr_1 - r_2$ , a plot of H versus G yields a straight line with slope  $r_1$  and intercept  $-r_2$ .

$r_{rac-LA} = 0.584$ ,  $r_{MAC} = 2.478$ .

**Table S4.** Reactivity ratio calculation for copolymerization of L-LA and MAC catalyzed by complex **2**.

<sup>a</sup> $f_1$  and  $f_2$  are defined as mole fractions of monomers LA and MAC in the feed and  $f_1 = 1 - f_2$ .

<sup>b</sup> $F_1$  and  $F_2$  represents the mole fraction of each monomer in the copolymer and  $F_1 = 1 - F_2$ .

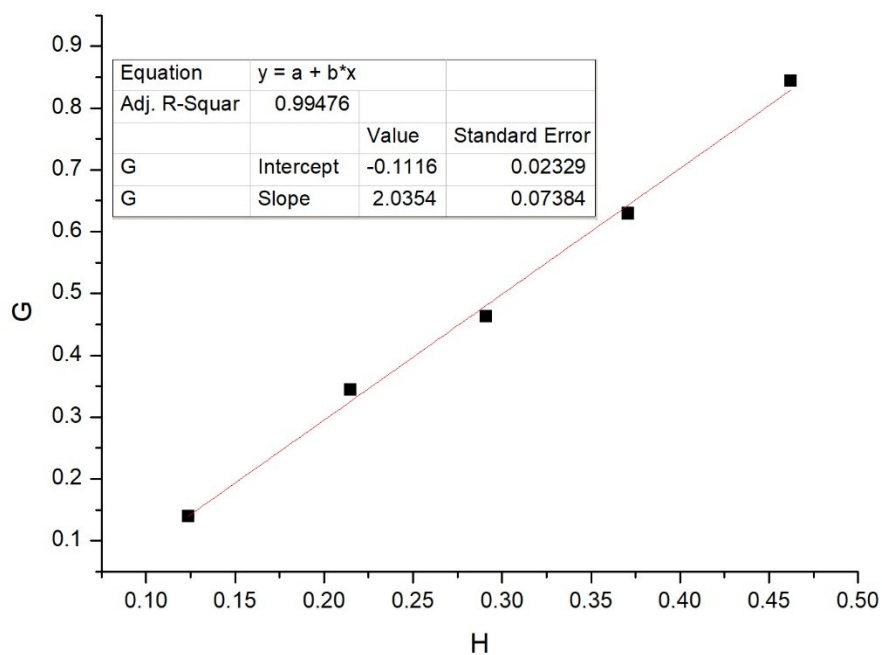

$$H = \frac{f_1^2(1 - F_1)}{(1 - f_1)^2 F_1}, \quad G = \frac{f_1(2F_1 - 1)}{(1 - f_1)F_1}$$

Where  $G = Hr_1 - r_2$ , a plot of H versus G yields a straight line with slope  $r_1$  and intercept  $-r_2$ .  
 $r_{L-LA} = 2.035$ ,  $r_{MAC} = 0.112$ .

**Table S5.** Reactivity ratio calculation for copolymerization of *rac*-LA and MAC catalyzed by complex **2**.

<sup>a</sup> $f_1$  and  $f_2$  are defined as mole fractions of monomers LA and MAC in the feed and  $f_1 = 1 - f_2$ .

<sup>b</sup> $F_1$  and  $F_2$  represents the mole fraction of each monomer in the copolymer and  $F_1 = 1 - F_2$ .

| entry | rac-LA    | MAC       | $f_1 / f_2$ | conversion |        |                           |                            |
|-------|-----------|-----------|-------------|------------|--------|---------------------------|----------------------------|
|       | $(f_1)^a$ | $(f_2)^a$ |             | LA (%)     | MAC(%) | LA ( $F_1$ ) <sup>b</sup> | MAC ( $F_2$ ) <sup>b</sup> |
| 1     | 0.8       | 0.2       | 4           | 13.58      | 7.89   | 0.873                     | 0.127                      |
| 2     | 0.7       | 0.3       | 2.333       | 11.82      | 6.22   | 0.816                     | 0.184                      |
| 3     | 0.6       | 0.4       | 1.5         | 11.67      | 5.59   | 0.758                     | 0.242                      |
| 4     | 0.5       | 0.5       | 1           | 10.11      | 5.53   | 0.646                     | 0.354                      |
| 5     | 0.4       | 0.6       | 0.667       | 11.52      | 5.08   | 0.602                     | 0.398                      |
| 6     | 0.3       | 0.7       | 0.429       | 11.95      | 5.48   | 0.483                     | 0.517                      |

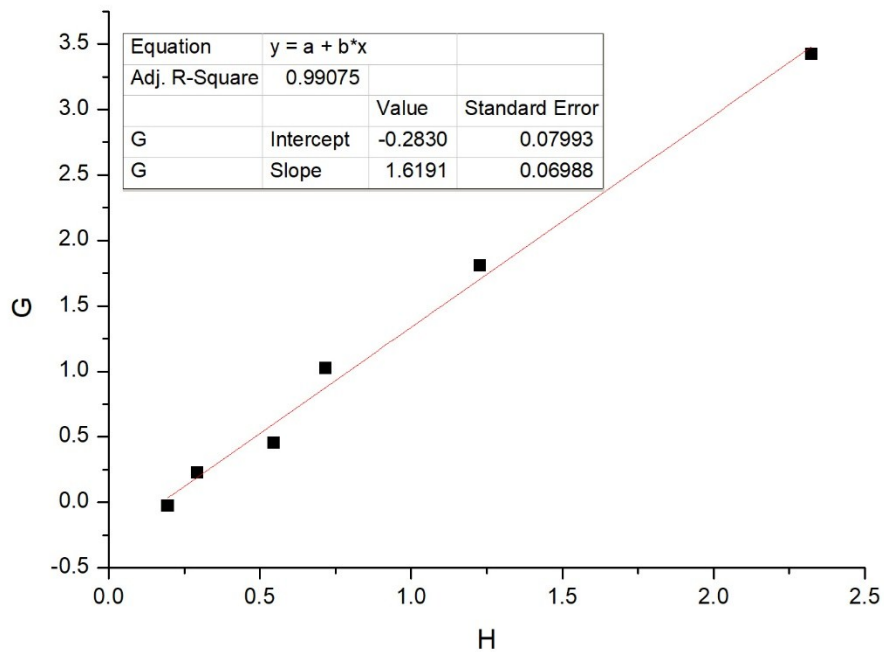

$$H = \frac{f_1^2(1 - F_1)}{(1 - f_1)^2 F_1}, \quad G = \frac{f_1(2F_1 - 1)}{(1 - f_1)F_1}$$

Where  $G = Hr_1 - r_2$ , a plot of H versus G yields a straight line with slope  $r_1$  and intercept  $-r_2$ .

$r_{rac-LA} = 1.619$ ,  $r_{MAC} = 0.283$ .
